# Supplementary figures and images for: Metoprolol for prophylaxis of postoperative atrial fibrillation in cardiac surgery patients: systematic review and meta-analysis
Source: HighWire-hosted journal article supplement (doi:10.1136/bmjopen-2020-038364), 2020-10-01

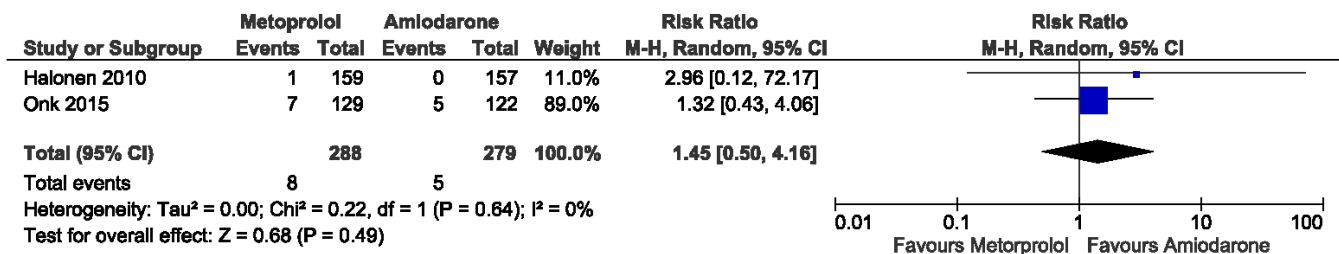

Supplement: bmjopen-2020-038364supp003_data_supplement.pdf [file bmjopen-2020-038364supp003_data_supplement.pdf]

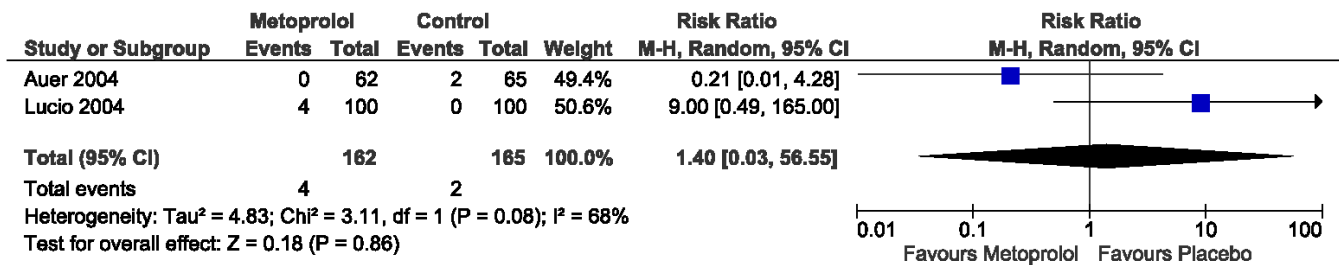

Supplement: bmjopen-2020-038364supp004_data_supplement.pdf [file bmjopen-2020-038364supp004_data_supplement.pdf]

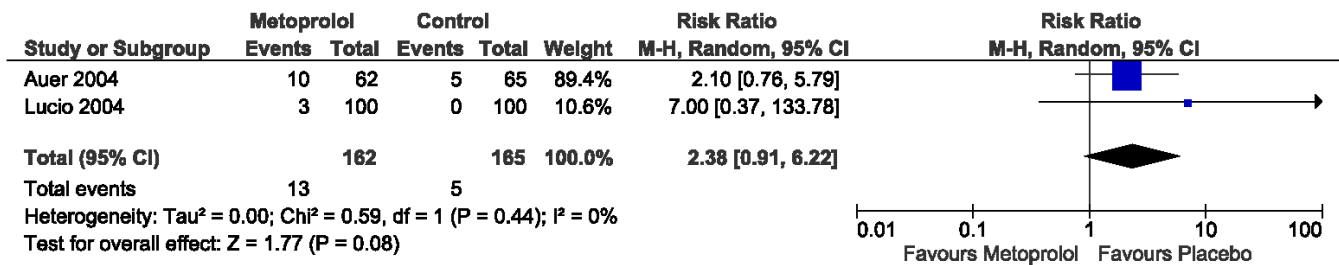

Supplement: bmjopen-2020-038364supp005_data_supplement.pdf [file bmjopen-2020-038364supp005_data_supplement.pdf]

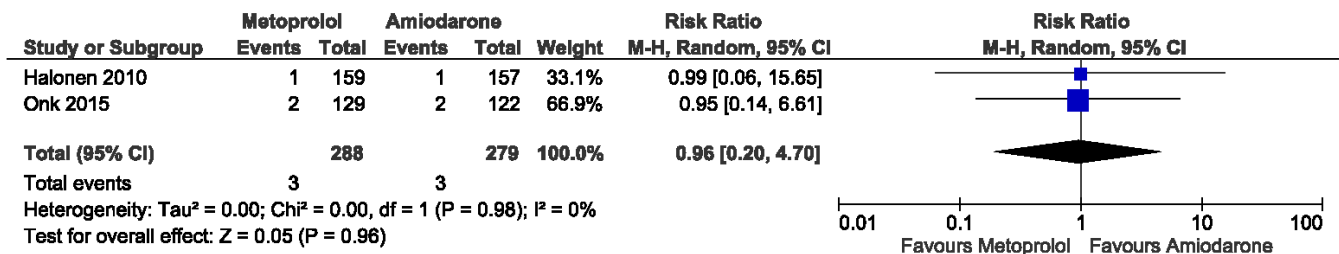

Supplement: bmjopen-2020-038364supp006_data_supplement.pdf [file bmjopen-2020-038364supp006_data_supplement.pdf]



Supplement: bmjopen-2020-038364supp003_data_supplement.pdf [file bmjopen-2020-038364supp003_data_supplement.pdf]



Supplement: bmjopen-2020-038364supp004_data_supplement.pdf [file bmjopen-2020-038364supp004_data_supplement.pdf]



Supplement: bmjopen-2020-038364supp005_data_supplement.pdf [file bmjopen-2020-038364supp005_data_supplement.pdf]
